# Supplementary material
Source: Springer Nature journal article supplement (https://www.springermedizin.de/resource/supplementary/13024_2011_238_MOESM3_ESM.pdf/9643730)
Supplement: MOESM3 [file 9643730]

**Table 1. Summary of neurogenesis changes in transgenic mouse models of AD**

| Genetic Manipulation | Strain Name                | Genotype                                              | Promoter    | Age (mon)     | Pathology (A $\beta$ deposition)   | Neurogenesis assessment                                                       | Effect                                                                                                | Reference |
|----------------------|----------------------------|-------------------------------------------------------|-------------|---------------|------------------------------------|-------------------------------------------------------------------------------|-------------------------------------------------------------------------------------------------------|-----------|
| <b>Knock-in</b>      |                            | mo PS1M146V/-                                         |             | 3             |                                    | BrdU injection twice daily (2 hr apart) for 4 consecutive days                | Decreased proliferation and differentiation                                                           | 36        |
|                      |                            | hu ApoE4                                              |             | 3, 6-7, 12-13 |                                    | BrdU injection twice (6 hr apart)                                             | Diminished neuronal maturation                                                                        | 41        |
|                      |                            | mo APP <sup>swe</sup> /PS1 $\Delta$ E9                |             | 8-9, 18-24    | post                               | DCX, MCM2 immunostaining                                                      | Decreased proliferation                                                                               | 42        |
| <b>Transgenic</b>    |                            | hu PS1P117L                                           | NSE         | 3-4           |                                    | one BrdU injection per day for 12 consecutive days                            | Decreased survival                                                                                    | 37        |
|                      |                            | hu PS1 $\Delta$ E9, hu PS1M146L                       | PrP         | 3             |                                    | single injection of BrdU                                                      | Decreased proliferation and differentiation                                                           | 38        |
|                      | Tg2576                     | chimeric mo-hu APP <sup>swe</sup>                     | PrP         | 12-14         | pre                                | five daily injections of BrdU                                                 | Decreased proliferation, survival and differentiation                                                 | 39        |
|                      | PDAPP                      | hu APP <sup>ind</sup>                                 | PDGF        | 2, 12         | pre, post                          | one i.p. injection of BrdU                                                    | Decreased proliferation and survival                                                                  | 40        |
|                      | APP/PS1                    | chimeric mo-hu APP <sup>swe</sup> /hu PS1 $\Delta$ E9 | PrP         | 6             | pre, post                          | BrdU injection once daily for 12 consecutive days                             | Decreased survival                                                                                    | 43        |
|                      | APP/PS1                    | chimeric mo-hu APP <sup>swe</sup> /hu PS1 $\Delta$ E9 | PrP         | 2             | pre                                | BrdU injection every 12 hr for 3 days                                         | Decreased proliferation and differentiation                                                           | 44        |
|                      | 3xTg-AD                    | hu APP <sup>swe</sup> /PS1M146V/tauP301L              | Thy-1.2     | 4, 9          |                                    |                                                                               | Decreased proliferation                                                                               | 45        |
|                      | J20                        | hu APP <sup>swe</sup> ,ind                            | PDGF        | 3, 12         | pre, post                          | BrdU injection twice daily (8 hr apart) for 3 consecutive days                | Increased proliferation and differentiation                                                           | 46        |
| J20                  | hu APP <sup>swe</sup> ,ind | PDGF                                                  | 3, 5, 9, 11 | pre, post     | daily injection of BrdU for 5 days | Increased proliferation and differentiation                                   | 47                                                                                                    |           |
| J20                  | hu APP <sup>swe</sup> ,ind | PDGF                                                  | 2-3         | pre           | BrdU injection for 3 days          | Accelerated early development but impaired late maturation of newborn neurons | 48                                                                                                    |           |
| <b>Knock-out</b>     |                            | ApoE                                                  |             | 3, 6-7, 12-13 |                                    | BrdU injection twice (6 hr apart)                                             | Reduced neurogenesis but increased astrogenesis                                                       | 41        |
|                      |                            | PS1/PS2 forebrain KO                                  |             | 7-9, 18-20    |                                    | single dose injection of BrdU                                                 | Enhanced cell proliferation at early stages of neurodegeneration but impaired survival at late stages | 49        |
